# Supplementary material for: The fliK Gene Is Required for the Resistance of Bacillus thuringiensis to Antimicrobial Peptides and Virulence in Drosophila melanogaster
Source: PubMed Central journal article supplement (PMC7775485; doi:10.3389/fmicb.2020.611220), 2020-12-18
Supplement: Data_Sheet_1.pdf [file Data_Sheet_1.pdf]

## Supplementary Material

(A)

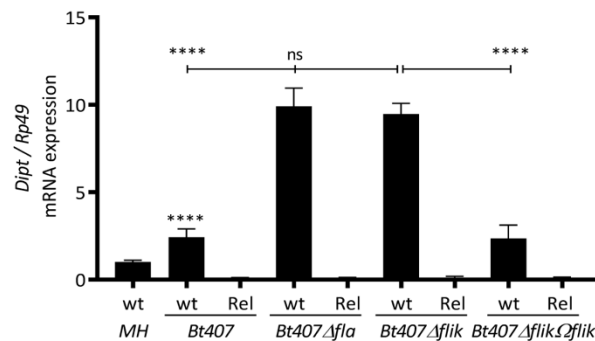

(B)

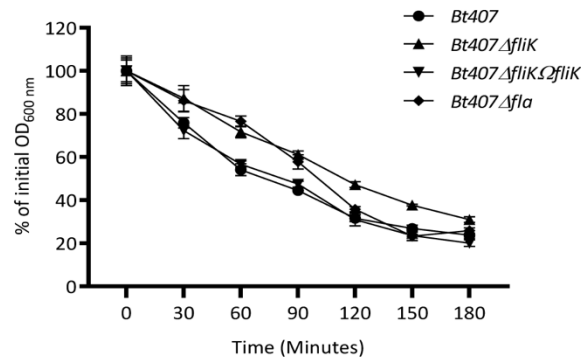

**Supplementary Figure 1. The loss of *Bacillus thuringiensis* flagellar filaments enhances the release of immunostimulatory fragments of peptidoglycan.** (A) Wild-type (wt) and *relish* (Rel) mutant flies were injected with the supernatant of *Bt407*, *Bt407*Δ*fliK*, *Bt407*Δ*fliK*Ω*fliK* or *Bt407*Δ*fla* cultures. Relative *Diptericin* (*Dipt*) expression was measured by RT-qPCR 4 h upon the induction. Ribosomal protein 49 (Rp49) transcript was used as reference gene. Transcripts levels are compared to that triggered in wt flies injected with Muller Hinton broth (MH) as a control. (B) Autolysis rates of *Bt407*, *Bt407*Δ*fliK*, *Bt407*Δ*fliK*Ω*fliK* and *Bt407*Δ*fla* in the presence of Triton X-100. Autolysis rates were determined over a period of 3 h (180 min) in PBS at 37 °C, without shaking. Data obtained from three independent experiments are combined in single value (mean ± sd). Statistical tests were performed using the Mann-Whitney test within Prism software (ns:  $p > 0.05$ ; \*\*\*\*:  $p < 0.0001$ ).

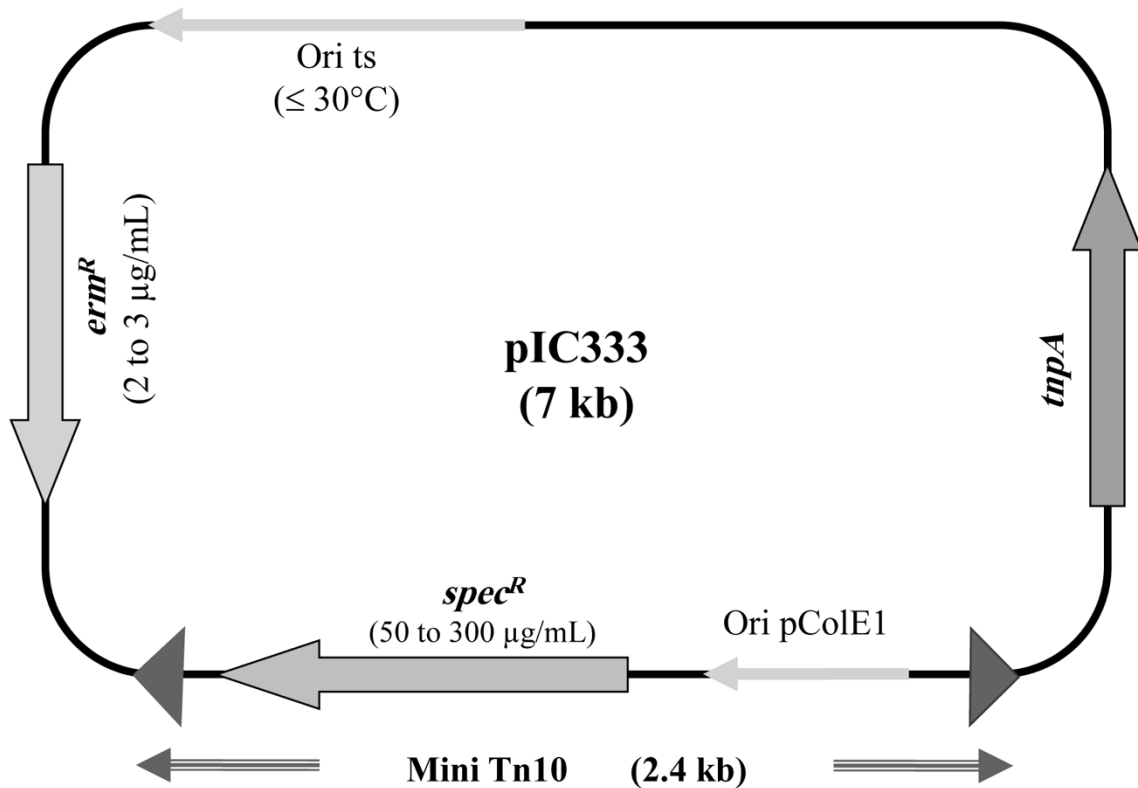

**Supplementary Figure 2. Map of the temperature sensitive plasmid pIC333.** The plasmid pIC333 carries the Gram-positive thermosensitive replication origin of pE194 plasmid (Ori ts), a gene conferring resistance to erythromycin (*erm<sup>R</sup>*), a Tn10 transposase gene (*tnpA*) and the transposable element mini-Tn10. The mini-Tn10 (double grey arrow) is a 2.4 kb transposon flanked by inverted terminal repeat ends (dark grey triangles), containing a pColE1-type origin of replication (Ori pColE1) and a gene coding for resistance to spectinomycin (*spec<sup>R</sup>*). This transposon system was originally used to generate random *B. subtilis* mutants (Steinmetz & Richter, 1994).

**Supplementary Table 2. Primers sequences used in this study.**

| Name       | Nucleotide sequence (5'→3')                                  | Restriction site |
|------------|--------------------------------------------------------------|------------------|
| fliK-a     | CGCGGATCCGAACGTGGTCGGGAAGTAAA                                | BamHI            |
| fliK-b     | CCAACGTGTTGGCAGCCTTTATTCTCCAATATCATCCATTCATACACATTTCAAATCCAG | None             |
| fliK-c     | CTGGATTGAAAATGTGTATGAATGGATGATATTGGAGGAATAAAGCGTGCCAACAGTTGG | None             |
| fliK-d     | CATGCCATGGCGCATTGTCCATGTATTCCC                               | NcoI             |
| CompfliK-a | CGCGGATCCGATGATATCGTTGAAGCGATACACC                           | BamHI            |
| CompfliK-b | GGTAATACAGACTGTATCACCTGTTTTTCATAGCCCCCTTC                    | None             |
| CompfliK-c | GGAAGGGGCTATGAAAACAGGTGATACAGTCTGTATTACC                     | None             |
| CompfliK-d | CCGGAATTCTTATTCTCCAATAATCCCGC                                | EcoRI            |
| E1         | CGTTGGCCGATTCATTAATGC                                        | None             |
| E3         | CGATATTCACGGTTTACCCAC                                        | None             |
| PU         | CGCCAGGGTTTTCCAGTCACGAC                                      | None             |
| PR         | AGCGGATAACAATTCACACAGGA                                      | None             |
| DiptRTFw   | GCTGCGCAATCGCTTCTACT                                         | None             |
| DiptRTRv   | TGGTGGAGTGGGCTTCATG                                          | None             |
| Rp49RTFw   | GACGCTTCAAGGGACAGTATCTG                                      | None             |
| Rp49RTRv   | AAACGCGGTTCTGCATGAG                                          | None             |
